# Supplementary material
Source: PubMed Central journal article supplement (PMC7185332)
Supplement: Supp_FigS1.pdf [file Supp_FigS1.pdf]

## Supplementary Data

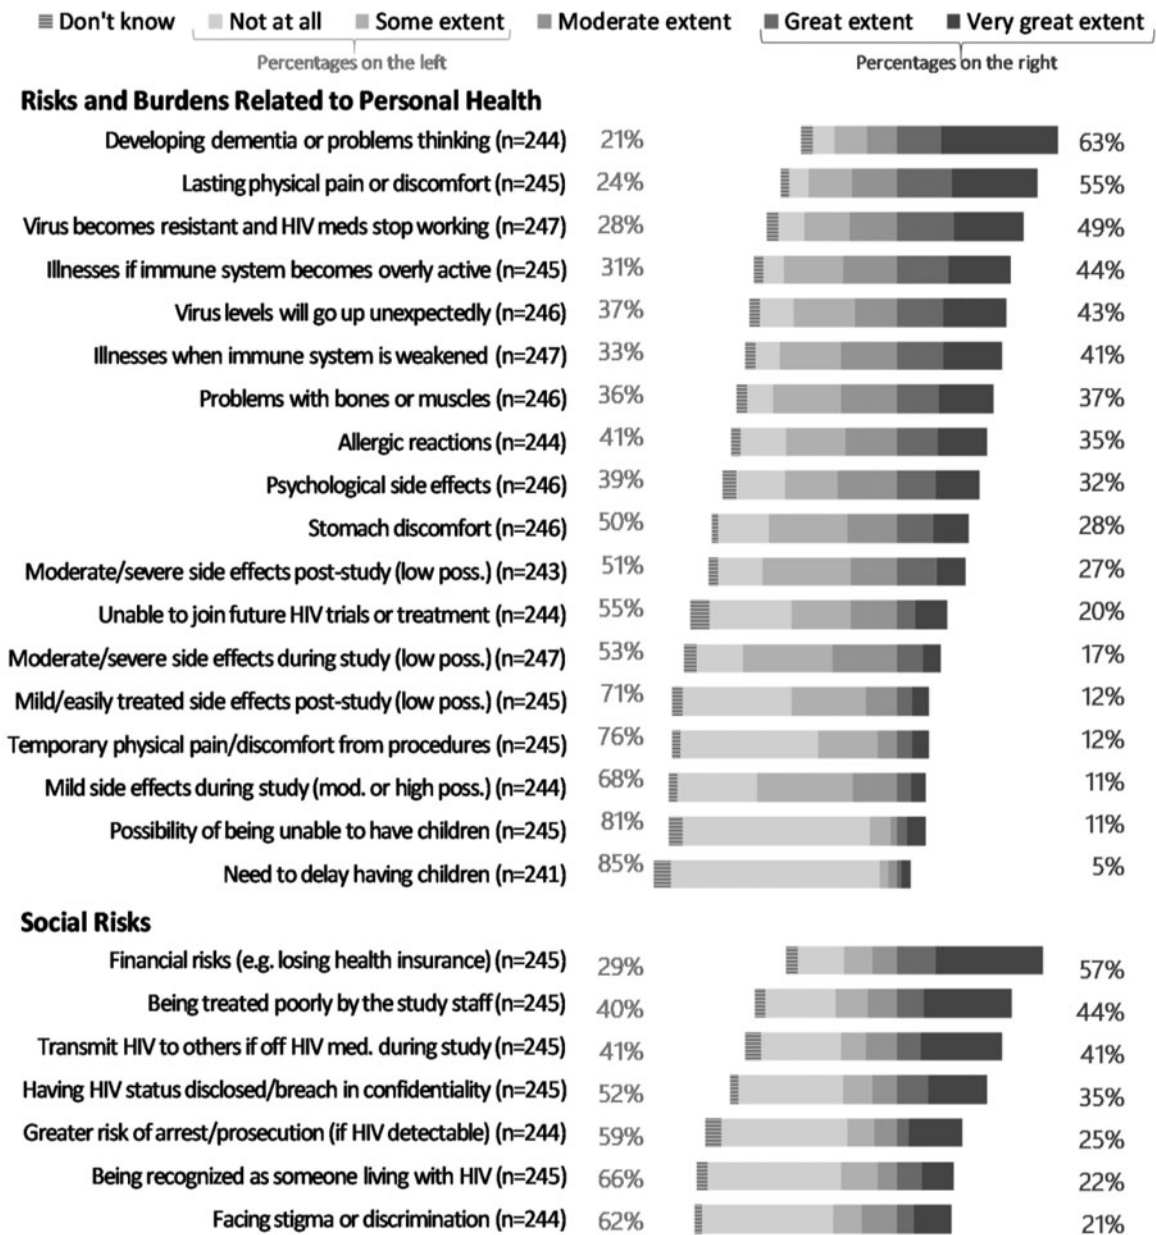

**SUPPLEMENTARY FIG. S1.** Extent to which risk factors are “likely to stop” respondents from participating in an HIV cure-oriented study (United States, 2018). Percentages on the *left* reflect the sum of “not at all” and “some extent” likelihood to stop respondent from participating in an HIV cure-oriented study. Percentages on the *right* reflect the sum of “very great extent” and “great extent” likelihood to stop respondent from participating in an HIV cure-oriented study.
