# Supplementary material
Source: PubMed Central journal article supplement (PMC7185332)
Supplement: Supp_FigS2-S3.pdf [file Supp_FigS2-S3.pdf]

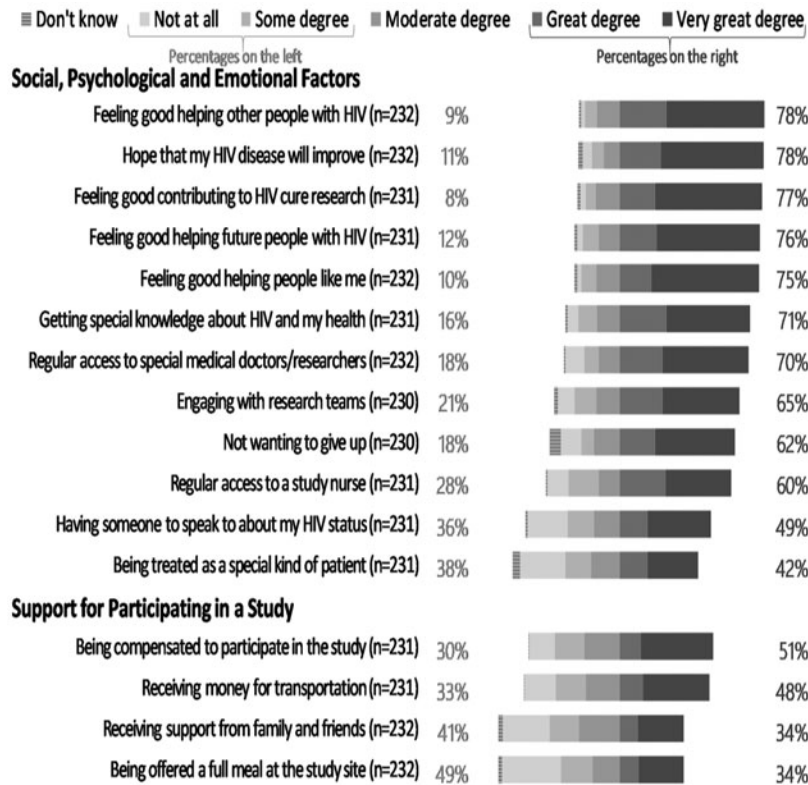

**SUPPLEMENTARY FIG. S2.** Degree by which factors would increase respondents’ willingness to participate in an HIV cure-oriented study (United States, 2018). Percentages on the *left* reflect the sum of “not at all” and some degree” by which respondent’s willingness to participate in an HIV cure-oriented study would increase. Percentages on the *right* reflect the sum of “very great degree” and “great degree” by which respondent’s willingness to participate in an HIV cure-oriented study would increase.

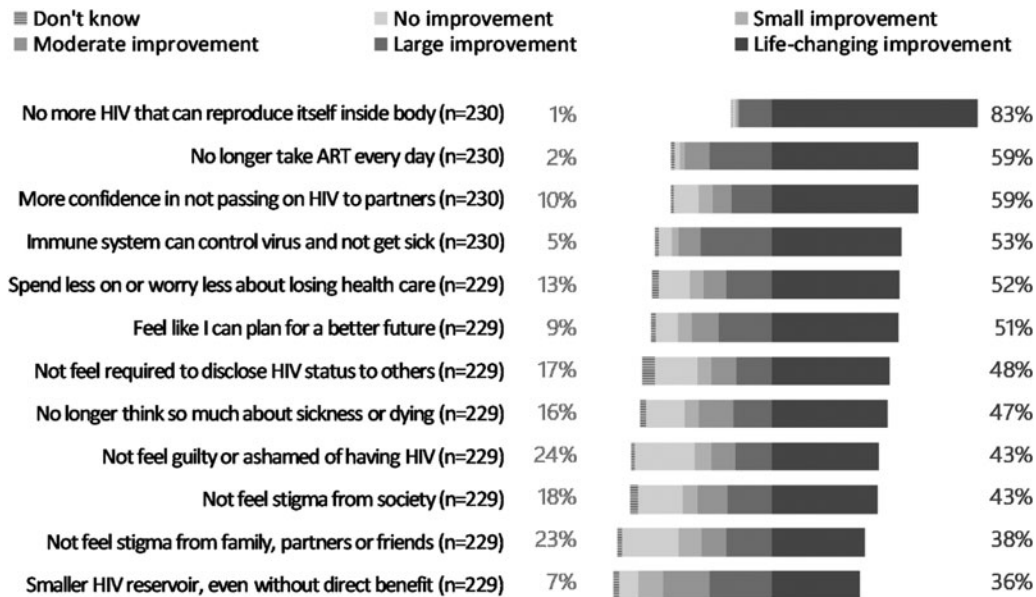

**SUPPLEMENTARY FIG. S3.** Improvement over current HIV medication strategy offered by a promising future HIV remission or cure strategy (United States, 2018). Percentages on the *left* reflect “no improvement.” Percentages on the *right* reflect “life-changing improvement.”
