# Supplementary material
Source: PubMed Central journal article supplement (PMC7185332)
Supplement: Supp_FigS4-S5.pdf [file Supp_FigS4-S5.pdf]

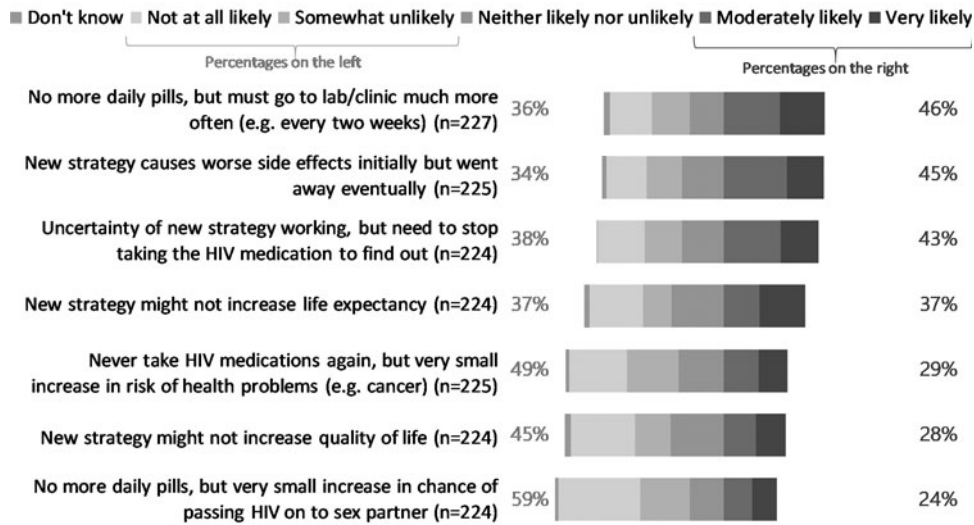

**SUPPLEMENTARY FIG. S4.** Likelihood of choosing a new HIV remission strategy over standard daily HIV medication under different scenarios (United States, 2018). Percentages on the *left* reflect the sum of “not at all likely” and “somewhat unlikely” to switch to the new HIV remission strategy and abandon current standard daily HIV medication strategy. Percentages on the *right* reflect “very likely” and “moderately likely” to switch to the new HIV remission strategy.

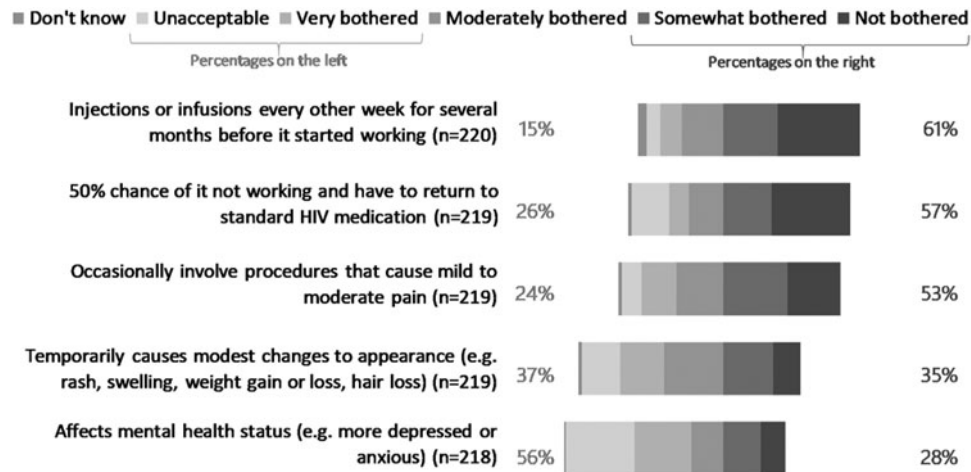

**SUPPLEMENTARY FIG. S5.** Acceptability of factors under new HIV remission strategy compared with experiences with standard HIV medications (United States, 2018). Percentages on the *left* reflect the sum of “unacceptable” and “very bothered” by the factor of the new HIV remission strategy compared with experience with standard HIV medications. Percentages on the *right* reflect the sum of “not bothered” and “somewhat bothered” by the factor of the new HIV remission strategy compared with experience with standard HIV medications.
