# Supplementary material
Source: PubMed Central journal article supplement (PMC7185332)
Supplement: Supp_TableS1.pdf [file Supp_TableS1.pdf]

SUPPLEMENTARY TABLE S1. BIVARIATE RESULTS: INCREASED LIKELIHOOD TO SWITCH TO A NEW HIV REMISSION STRATEGY IN SCENARIOS 1–7 BASED ON PAST PARTICIPATION IN HIV TRIALS AND SELF-ASSESSED WILLINGNESS TO TRY ALTERNATIVE HIV THERAPIES

| <i>Increased likelihood of choosing new HIV remission strategy over standard daily ART if...</i> |                                                                                                                                |                                                                                                                       |                                                                                                                                |                                                                                                                                |                                                                                                                                |                                                                                                                                |                                                                                                                                |
|--------------------------------------------------------------------------------------------------|--------------------------------------------------------------------------------------------------------------------------------|-----------------------------------------------------------------------------------------------------------------------|--------------------------------------------------------------------------------------------------------------------------------|--------------------------------------------------------------------------------------------------------------------------------|--------------------------------------------------------------------------------------------------------------------------------|--------------------------------------------------------------------------------------------------------------------------------|--------------------------------------------------------------------------------------------------------------------------------|
| <i>Characteristic</i>                                                                            | <i>No more daily pills, but must go to lab/clinic much more often (e.g., every 2 weeks) [Scenario 1]</i>                       | <i>No more daily pills, but very small increase in chance of passing HIV on to sex partner [Scenario 2]</i>           | <i>New strategy causes worse side effects initially but went away eventually [Scenario 3]</i>                                  | <i>Never take HIV medications again, but very small increase in risk of health problems (e.g., cancer) [Scenario 4]</i>        | <i>Uncertainty of new strategy working, but need to stop taking the HIV medication to find out [Scenario 5]</i>                | <i>New strategy might not increase life expectancy [Scenario 6]</i>                                                            | <i>New strategy might not increase quality of life [Scenario 7]</i>                                                            |
| Participated in HIV treatment study                                                              |                                                                                                                                | Participated previously (OR = 1.82) more likely to choose HIV remission than those who did not participate previously | Participated previously (OR = 2.72) more likely to choose HIV remission than those who did not participate previously          | Participated previously (OR = 2.43) more likely to choose HIV remission than those who did not participate previously          | Participated previously (OR = 2.09) more likely to choose HIV remission than those who did not participate previously          | Participated previously (OR = 2.40) more likely to choose HIV remission than those who did not participate previously          | Participated previously (OR = 2.62) more likely to choose HIV remission than those who did not participate previously          |
| Participated in HIV cure study                                                                   |                                                                                                                                |                                                                                                                       |                                                                                                                                | Participated previously (OR = 2.17) more likely to choose HIV remission than those who did not participate previously          |                                                                                                                                |                                                                                                                                |                                                                                                                                |
| Self-assessed willingness to try alternative HIV therapy                                         | Gladly would try alternative therapy (OR = 1.86) more likely to choose HIV remission than those not willing to try alternative |                                                                                                                       | Gladly would try alternative therapy (OR = 2.26) more likely to choose HIV remission than those not willing to try alternative | Gladly would try alternative therapy (OR = 1.87) more likely to choose HIV remission than those not willing to try alternative | Gladly would try alternative therapy (OR = 2.39) more likely to choose HIV remission than those not willing to try alternative | Gladly would try alternative therapy (OR = 2.25) more likely to choose HIV remission than those not willing to try alternative | Gladly would try alternative therapy (OR = 2.04) more likely to choose HIV remission than those not willing to try alternative |

ART, antiretroviral therapy; OR, odds ratio.
